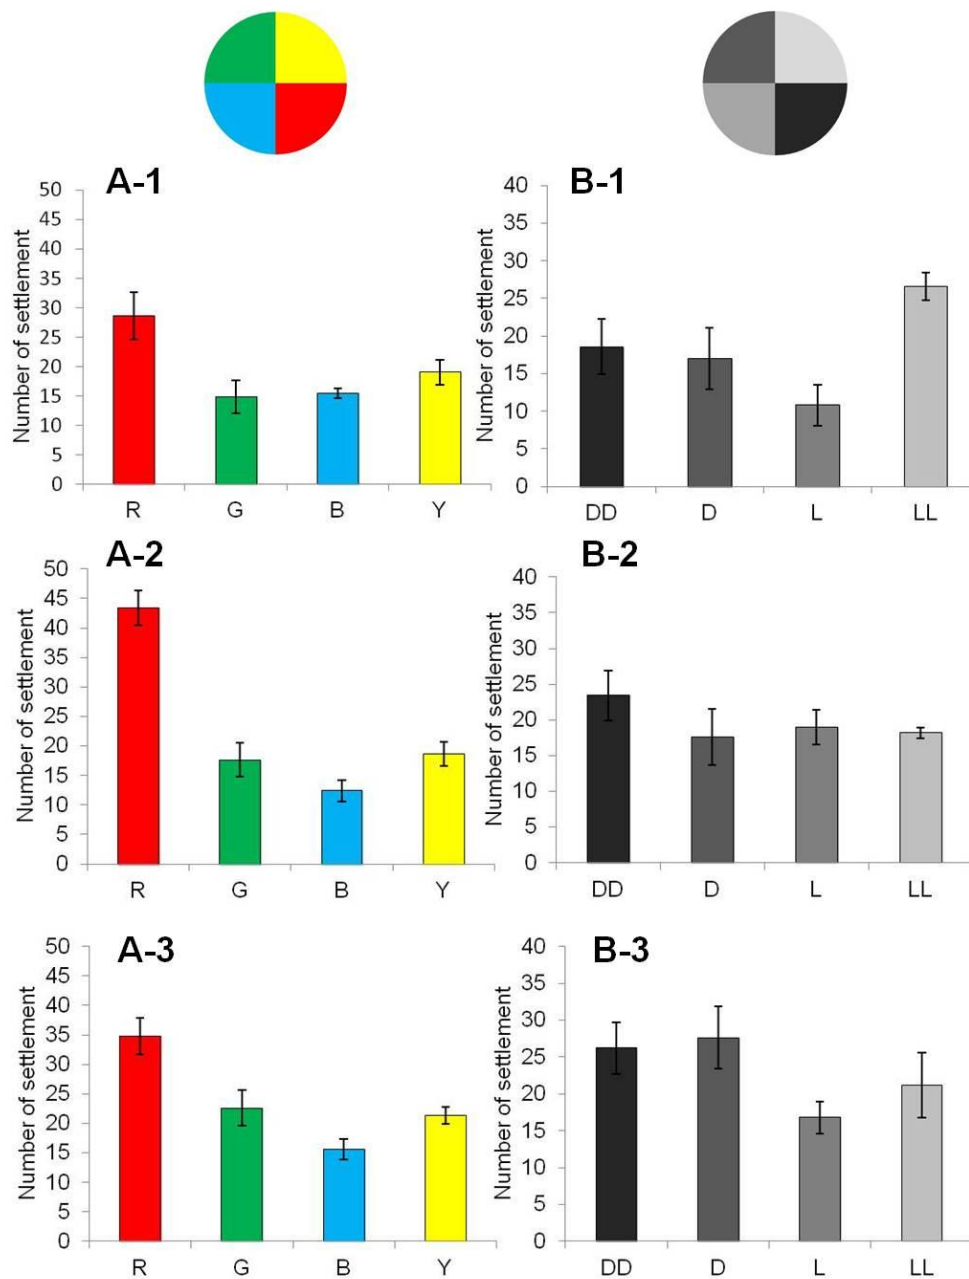

**Figure S1. Larval settlement assays for color discrimination (results of each experiment using three different batches)**

(A-1, A-2, A-3) Mean numbers  $\pm$ SE of settled cyprids on red (R), green (G), blue (B) and yellow (Y) surface in each Petri-dish for color discrimination assay.

(B-1, B-2, B-3) Mean numbers  $\pm$ SE of settled cyprids on gray-colored surface with different brightness. DD: darkest, D: second darkest, L: second lightest, LL: lightest gray surfaces.

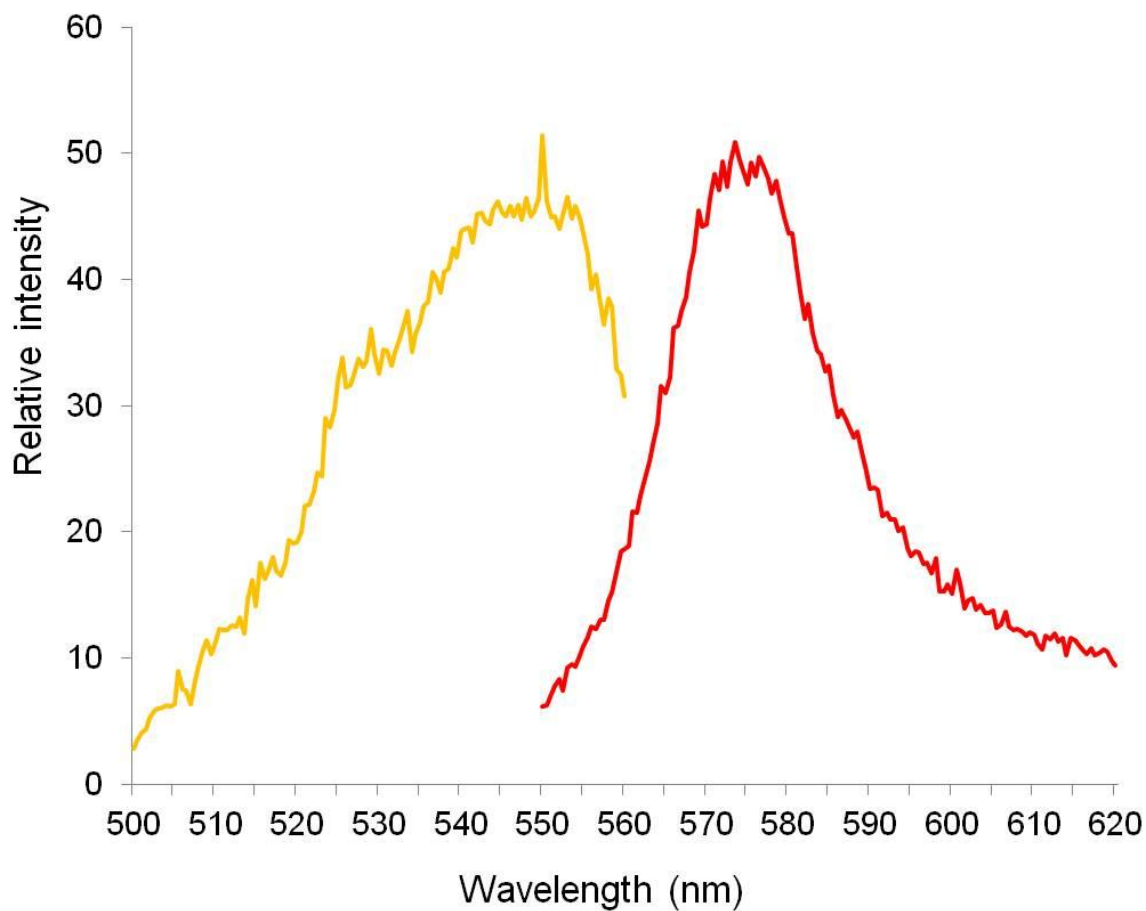

**Figure S2. Fluorescent spectrum of barnacle extracts.**

Fluorescent spectrum of barnacle crude extracts was measured with a SLM 8000 Spectrofluorimeter (SLM Instruments, Inc.). Orange colored line indicates excitation spectrum at 590 nm of emission wavelength. Red colored line indicates emission spectrum at 530 nm of excitation wavelength. Maximum excitation and emission wavelengths were detected at 540-550 nm and 570-580 nm, respectively.
